# Supplementary material for: Circulating miRNA-24 and its target YKL-40 as potential biomarkers in patients with coronary heart disease and type 2 diabetes mellitus
Source: PubMed Central journal article supplement (PMC5609901; doi:10.18632/oncotarget.18593), 2017-06-21
Supplement: oncotarget-08-63038-s001.pdf [file oncotarget-08-63038-s001.pdf]

## Circulating miRNA-24 and its target YKL-40 as potential biomarkers in patients with coronary heart disease and type 2 diabetes mellitus

### SUPPLEMENTARY MATERIALS

Supplementary Table 1: General clinical data

| Characteristics              | Control      | CHD                      | CHD-DM2                    |
|------------------------------|--------------|--------------------------|----------------------------|
| Number                       | 31           | 35                       | 28                         |
| Sex (male/female)            | 16(51.6)     | 18(51.4)                 | 16(57.1)                   |
| Age (years)                  | 60.3±7.3     | 61.3±6.6                 | 65.1±7.2                   |
| Hypertension                 | 15(48.4)     | 16(45.7)                 | 15(53.6)                   |
| Smoker                       | 12(38.7)     | 11(31.4)                 | 9(32.1)                    |
| GLU/(mmol·L <sup>-1</sup> )  | 5.11±1.25    | 4.93±1.12                | 8.69±1.52 <sup>(a,b)</sup> |
| ALT/(U·L <sup>-1</sup> )     | 20.33±10.21  | 23.56±9.19               | 26.55±12.62                |
| AST/(U·L <sup>-1</sup> )     | 21.92±6.98   | 25.39±7.18               | 29.14±11.12                |
| TG(mmol·L <sup>-1</sup> )    | 1.15±0.67    | 1.41±1.02                | 1.43±1.15                  |
| TC (mmol·L <sup>-1</sup> )   | 4.29±0.71    | 4.28±0.55                | 4.91±1.06                  |
| LDL-C(mmol·L <sup>-1</sup> ) | 1.87±1.38    | 2.25±0.82                | 2.11±0.92                  |
| HDL-C(mmol·L <sup>-1</sup> ) | 1.05±0.33    | 1.12±0.29                | 1.03±0.62                  |
| Cr/(μmol·L <sup>-1</sup> )   | 43.30±5.80   | 41.48±6.81               | 43.62±6.82                 |
| BUN/(mmol·L <sup>-1</sup> )  | 5.16±1.61    | 5.29±1.22                | 5.18±1.83                  |
| UA/(μmol·L <sup>-1</sup> )   | 346.98±59.81 | 368.88±62.55             | 370.91±69.92               |
| Gensini Score                | 0            | 46.4±9.73 <sup>(a)</sup> | 64.6±9.64 <sup>(a,b)</sup> |

Data are presented as number (percentage) for categorical data or mean ± standard error of mean (M ± SEM) for parametrically distributed data. DM2: type 2 diabetes mellitus; CHD: coronary heart disease; GLU: fasting glucose; ALT: alanine transaminase; AST: aspartate transaminase; LDL-C: low-density lipoprotein cholesterol; HDL-C: high-density lipoprotein cholesterol; TC: total cholesterol; TG: triglyceride. Cr: creatinine; BUN: blood urea nitrogen; UA: uric acid. <sup>a</sup>p<0.05, <sup>b</sup>p<0.005 compared to controls and CHD.

**Supplementary Table 2: The sequences of primers used in the study**

|                                |                                             |                                                                    |
|--------------------------------|---------------------------------------------|--------------------------------------------------------------------|
| Stem-loop Q-RT-PCR for miR-24  | Stem-loop RT primer of miR-24               | 5'-CTCAACTGGTGTTCGTGGAGTCGGCAATTCA GTTGCTGCTGA -3'                 |
|                                | Sense primer of miR-24                      | 5'- ACACTCCAGCTGGGTGGCTCAGTTCAGCA GG-3'                            |
|                                | Antisense primer of miR-24                  | 5'- CTCAACTGGTGTTCGTGGA -3'                                        |
|                                | Sense primer of reference gene U6           | 5'-CTCGCTTCGGCAGCACACA-3'                                          |
|                                | Antisense primer of reference gene U6       | 5'-AACGCTTCACGAATTTGCGT-3'                                         |
| Real-time PCR for human YKL-40 | Sense primer of YKL-40                      | 5'-TGCCCTTGACCGCTCCTCTGTACC-3'                                     |
|                                | Antisense primer of YKL-40                  | 5'- GAGCGTCACATCATTCCACTC -3'                                      |
|                                | Sense primer of reference gene 18S rRNA     | 5'-CCTGGATACCGCAGCTAGGA-3'                                         |
|                                | Antisense primer of reference gene 18S rRNA | 5'-GCGGCGCAATACGAATGCCCC-3'                                        |
| Vector construction            | Sense primer of YKL-40 XhoIF                | 5'-CCGCTCGAGCCCTCTGTTCTGCACACAGCAC GGGGGCCA-3'                     |
|                                | Antisense primer of YKL-40 NotIR            | 5'-ATAAGAATGCGGCCGCTCACTGTAAAGCTCTT GTACTTTAT-3'                   |
|                                | Sense primer of mut-YKL-40                  | 5'-ATCACCTGCCCTGCTGAGTCCCAGGTGACAT TTCAGTCTCCCTCCCTTGGGGCCTATG -3' |
|                                | Antisense primer of mut-YKL-40              | 5'-CATAGGCCCAAGGGAGGGAGACTGAAATGTC ACCTGGGACTCAGCAGGGCAGGTGAT-3'   |
